# Supplementary material
Source: ML conference proceedings conference paper supplement (https://proceedings.mlr.press/v38/zhu15.html)
Supplement: Supplementary file 1 [file zhu15-supp.pdf]

---

# Supplementary Materials for: The Log-Shift Penalty for Adaptive Estimation of Multiple Gaussian Graphical Models

---

**Yuancheng Zhu**  
University of Chicago

**Rina Foygel Barber**  
University of Chicago

## A Proofs

*Proof of Theorem 1.* For any  $\Omega^{(k)} \succeq 0$  with  $\|\Omega^{(k)}\|_{\text{op}} \leq b_k$ ,

$$\begin{aligned} & \lambda_{\min} \left[ \nabla_{\Omega^{(k)}}^2 \left( \langle \Omega^{(k)}, S^{(k)} \rangle - \log \det(\Omega^{(k)}) \right) \right] \\ &= \lambda_{\min} \left[ \Omega^{(k)-1} \otimes \Omega^{(k)-1} \right] \\ &= \left[ \lambda_{\min}(\Omega^{(k)-1}) \right]^2 = \frac{1}{\|\Omega^{(k)}\|_{\text{op}}^2} \geq \frac{1}{b_k^2}. \end{aligned}$$

Then

$$\Omega \mapsto \sum_{k=1}^K \frac{n_k}{2} \left( \langle \Omega^{(k)}, S^{(k)} \rangle - \log \det(\Omega^{(k)}) - \frac{\|\Omega^{(k)}\|_F^2}{b_k^2} \right)$$

is a convex function over  $\Omega \in \mathcal{S}_p(b)$ . Applying Lemma 1 given below, the function

$$x \mapsto \log(1 + f(x)/\beta) + \frac{L^2}{2\beta^2} \|x\|_2^2$$

is convex, and so the following is a convex function over  $\Omega \in \mathcal{S}_p(b)$ :

$$\begin{aligned} \Omega \mapsto & \sum_{k=1}^K \frac{n_k}{2} \left( \langle \Omega^{(k)}, S^{(k)} \rangle - \log \det(\Omega^{(k)}) - \frac{\|\Omega^{(k)}\|_F^2}{b_k^2} \right) \\ & + \gamma \sum_{i < j} \beta \left[ \log(1 + f(\Omega_{ij})/\beta) + \frac{L^2}{2\beta^2} \|\Omega_{ij}\|_2^2 \right] \\ = & F(\Omega) - \sum_{k=1}^K \frac{n_k}{2} \cdot \frac{\|\Omega^{(k)}\|_F^2}{b_k^2} + \gamma \sum_{i < j} \frac{L^2}{2\beta} \|\Omega_{ij}\|_2^2 \\ = & F(\Omega) - \sum_{k=1}^K \|\Omega^{(k)}\|_F^2 \cdot \left( \frac{n_k}{2b_k^2} - \frac{\gamma L^2}{4\beta} \right), \end{aligned}$$

where the switch from a 2 to a 4 in the last step comes from the fact that  $\Omega_{ij}$  is penalized for  $i < j$  but not  $i > j$ .

This proves that  $F(\Omega)$  is convex over  $\mathcal{S}_p(b)$  as long as  $\frac{n_k}{2b_k^2} \geq \frac{\gamma L^2}{4\beta}$  for all  $k$ , which is equivalent to the condition in the theorem. If this inequality is strictly satisfied, then this implies strict convexity of  $F(\Omega)$ .  $\square$

**Lemma 1.** Let  $f : \mathbb{R}^p \rightarrow \mathbb{R}$  be a  $L$ -Lipschitz convex non-negative function and fix any  $\beta > 0$ . Then

$$x \mapsto \log(1 + f(x)/\beta) + \frac{L^2}{2\beta^2} \|x\|_2^2$$

is a convex function.

*Proof.* Take any  $x, y \in \mathbb{R}^p$ , and any  $t \in [0, 1]$ . Then, using the convexity of  $f(\cdot)$ ,

$$\begin{aligned} & \log(1 + f(t \cdot x + (1-t) \cdot y)/\beta) \\ & \leq \log(1 + t \cdot f(x)/\beta + (1-t) \cdot f(y)/\beta) \\ & = \log(t \cdot (1 + f(x)/\beta) + (1-t) \cdot (1 + f(y)/\beta)) \end{aligned}$$

Since  $\frac{\partial^2}{\partial z^2} \log(z) \in [-1, 0]$  for all  $z \geq 1$ ,

$$\begin{aligned} & \leq t \cdot \log(1 + f(x)/\beta) + (1-t) \cdot \log(1 + f(y)/\beta) \\ & \quad + \frac{t(1-t)}{2\beta^2} \cdot (f(y) - f(x))^2 \\ & \leq t \cdot \log(1 + f(x)/\beta) + (1-t) \cdot \log(1 + f(y)/\beta) \\ & \quad + \frac{t(1-t)}{2\beta^2} \cdot L^2 \|x - y\|_2^2. \end{aligned}$$

Then

$$\begin{aligned} & \log(1 + f(t \cdot x + (1-t) \cdot y)/\beta) \\ & \quad + \frac{L^2}{2\beta^2} \|t \cdot x + (1-t) \cdot y\|_2^2 \\ & \leq t \cdot \log(1 + f(x)/\beta) + (1-t) \cdot \log(1 + f(y)/\beta) \\ & \quad + \frac{t(1-t)}{2\beta^2} \cdot L^2 \|x - y\|_2^2 + \frac{L^2}{2\beta^2} \|t \cdot x + (1-t) \cdot y\|_2^2 \\ & \leq t \cdot \left[ \log(1 + f(x)/\beta) + \frac{L^2}{2\beta^2} \|x\|_2^2 \right] \\ & \quad + (1-t) \cdot \left[ \log(1 + f(y)/\beta) + \frac{L^2}{2\beta^2} \|y\|_2^2 \right], \end{aligned}$$

proving convexity of the function as desired.  $\square$

*Proof of Theorem 2.* Define

$$\begin{aligned} \mathcal{S}_p(b; \mathcal{A}) \\ = \left\{ \mathbf{\Omega} \in \mathcal{S}_p(b) : \Omega_{ij}^{(k)} = 0, \forall k \text{ and } \forall i \not\sim_{\mathcal{A}} j \right\} \subset \mathcal{S}_p(b) \end{aligned}$$

and let

$$\widehat{\mathbf{\Omega}} \in \arg \min_{\mathbf{\Omega} \in \mathcal{S}_p(b; \mathcal{A})} F(\mathbf{\Omega}).$$

We will show that  $\widehat{\mathbf{\Omega}}$  is a minimizer of  $F(\mathbf{\Omega})$  over the larger set  $\mathcal{S}_p(b)$ .

Take any  $\Delta = (\Delta^{(1)}, \dots, \Delta^{(K)})$  with  $\Delta^{(k)} \in \mathbb{R}^{d \times d}$  for each  $k$ . Let  $D$  and  $E$  be the block-diagonal and off-block-diagonal parts of  $\Delta$ ; that is,

$$\begin{aligned} D_{ij}^{(k)} &= \begin{cases} \Delta_{ij}^{(k)} & \text{if } i \sim_{\mathcal{A}} j \\ 0 & \text{if } i \not\sim_{\mathcal{A}} j \end{cases} \\ \text{and } E_{ij}^{(k)} &= \begin{cases} 0 & \text{if } i \sim_{\mathcal{A}} j \\ \Delta_{ij}^{(k)} & \text{if } i \not\sim_{\mathcal{A}} j \end{cases}. \end{aligned}$$

Suppose that  $\widehat{\mathbf{\Omega}} + \Delta \in \mathcal{S}_p(b)$ . Then

$$\begin{aligned} b_k &\geq \|\widehat{\mathbf{\Omega}}^{(k)} + \Delta^{(k)}\| \geq \left\| \left( \widehat{\mathbf{\Omega}}^{(k)} + \Delta^{(k)} \right)_{A_r, A_r} \right\| \\ &= \left\| \left( \widehat{\mathbf{\Omega}}^{(k)} + D^{(k)} \right)_{A_r, A_r} \right\|, \end{aligned}$$

and so

$$\|\widehat{\mathbf{\Omega}}^{(k)} + D^{(k)}\| = \max_r \left\| \left( \widehat{\mathbf{\Omega}}^{(k)} + D^{(k)} \right)_{A_r, A_r} \right\| \leq b_k,$$

proving that  $\widehat{\mathbf{\Omega}} + D \in \mathcal{S}_p(b; \mathcal{A})$ . Then by optimality of  $\widehat{\mathbf{\Omega}}$  over the set  $\mathcal{S}_p(b; \mathcal{A})$ ,

$$F(\widehat{\mathbf{\Omega}} + D) \geq F(\widehat{\mathbf{\Omega}}).$$

Then

$$\begin{aligned} F(\widehat{\mathbf{\Omega}} + \Delta) &= F(\widehat{\mathbf{\Omega}} + D + E) \\ &= \sum_{k=1}^K \frac{n_k}{2} \left( \langle \widehat{\mathbf{\Omega}}^{(k)} + D^{(k)} + E^{(k)}, S^{(k)} \rangle \right. \\ &\quad \left. - \log \det(\widehat{\mathbf{\Omega}}^{(k)} + D^{(k)} + E^{(k)}) \right) \\ &\quad + \gamma \sum_{i < j} \beta \log(1 + f(\widehat{\mathbf{\Omega}}_{ij} + D_{ij} + E_{ij})/\beta) \end{aligned}$$

Since  $D_{ij}$  and  $\widehat{\mathbf{\Omega}}_{ij}$  are nonzero only when  $i, j$  are in the same block, and  $E_{ij}$  is nonzero only if  $i, j$  are in different blocks,

$$\begin{aligned} &= \sum_{k=1}^K \frac{n_k}{2} \left( \langle \widehat{\mathbf{\Omega}}^{(k)} + D^{(k)}, S^{(k)} \rangle - \log \det(\widehat{\mathbf{\Omega}}^{(k)} + D^{(k)}) \right) \\ &\quad + \gamma \sum_{i < j} \beta \log(1 + f(\widehat{\mathbf{\Omega}}_{ij} + D_{ij})/\beta) \\ &\quad + \sum_{k=1}^K \frac{n_k}{2} \left( \langle E^{(k)}, S^{(k)} \rangle - \log \det(\widehat{\mathbf{\Omega}}^{(k)} + D^{(k)} + E^{(k)}) \right) \\ &\quad + \log \det(\widehat{\mathbf{\Omega}}^{(k)} + D^{(k)}) \\ &\quad + \gamma \sum_{i \not\sim_{\mathcal{A}} j, i < j} \beta \log(1 + f(E_{ij})/\beta) \end{aligned}$$

Letting  $M = \#\{(i, j) : i \not\sim_{\mathcal{A}} j, i < j\}$ ,

$$\begin{aligned} &= F(\widehat{\mathbf{\Omega}} + D) - M\gamma \cdot \beta \log(1 + f(\mathbf{0})/\beta) \\ &\quad + \sum_{k=1}^K \frac{n_k}{2} \left( \langle E^{(k)}, S^{(k)} \rangle - \log \det(\widehat{\mathbf{\Omega}}^{(k)} + D^{(k)} + E^{(k)}) \right) \\ &\quad + \log \det(\widehat{\mathbf{\Omega}}^{(k)} + D^{(k)}) \\ &\quad + \gamma \sum_{i \not\sim_{\mathcal{A}} j, i < j} \beta \log(1 + f(E_{ij})/\beta) \end{aligned}$$

By optimality of  $\mathbf{\Omega}$  over  $\mathcal{S}_p(b; \mathcal{A})$ ,

$$\begin{aligned} &\geq F(\widehat{\mathbf{\Omega}}) - M\gamma \cdot \beta \log(1 + f(\mathbf{0})/\beta) \\ &\quad + \sum_{k=1}^K \frac{n_k}{2} \left( \langle E^{(k)}, S^{(k)} \rangle - \log \det(\widehat{\mathbf{\Omega}}^{(k)} + D^{(k)} + E^{(k)}) \right) \\ &\quad + \log \det(\widehat{\mathbf{\Omega}}^{(k)} + D^{(k)}) \\ &\quad + \gamma \sum_{i \not\sim_{\mathcal{A}} j, i < j} \beta \log(1 + f(E_{ij})/\beta) \end{aligned}$$

Since  $\frac{\partial}{\partial \mathbf{\Omega}} \log \det(\mathbf{\Omega}) = -\mathbf{\Omega}^{-1}$  and  $\|\nabla^2 \log \det(\mathbf{\Omega}')\|$  is bounded for  $\mathbf{\Omega}'$  near  $\mathbf{\Omega}$ , we can apply a Taylor expansion to the difference of  $\log \det(\cdot)$  terms:

$$\begin{aligned} &= F(\widehat{\mathbf{\Omega}}) - M\gamma \cdot \beta \log(1 + f(\mathbf{0})/\beta) \\ &\quad + \sum_{k=1}^K \frac{n_k}{2} \left( \langle E^{(k)}, S^{(k)} \rangle - \langle E^{(k)}, -(\mathbf{\Omega}^{(k)} + D^{(k)})^{-1} \rangle \right. \\ &\quad \left. - \mathcal{O}(\|E^{(k)}\|_F^2) \right) \\ &\quad + \gamma \sum_{i \not\sim_{\mathcal{A}} j, i < j} \beta \log(1 + f(E_{ij})/\beta) \end{aligned}$$

Since  $\widehat{\Omega}^{(k)} + D^{(k)}$  is block-diagonal and therefore so is  $(\widehat{\Omega}^{(k)} + D^{(k)})^{-1}$ , while  $E^{(k)}$  is supported off of the diagonal blocks,

$$\begin{aligned} &= F(\widehat{\Omega}) - M\gamma \cdot \beta \log(1 + f(\mathbf{0})/\beta) \\ &\quad + \sum_{k=1}^K \frac{n_k}{2} \left( \langle E^{(k)}, S^{(k)} \rangle - \mathcal{O}(\|E^{(k)}\|_F^2) \right) \\ &\quad + \gamma \sum_{i \neq \mathcal{A}j, i < j} \beta \log(1 + f(E_{ij})/\beta) \end{aligned}$$

Applying Taylor expansion to the terms  $\log(1 + f(E_{ij})/\beta)$ , for  $E_{ij}$  sufficiently close to 0,

$$\begin{aligned} &= F(\widehat{\Omega}) - M\gamma \cdot \beta \log(1 + f(\mathbf{0})/\beta) \\ &\quad + \sum_{k=1}^K \frac{n_k}{2} \left( \langle E^{(k)}, S^{(k)} \rangle - \mathcal{O}(\|E^{(k)}\|_F^2) \right) \\ &\quad + \gamma \sum_{i \neq \mathcal{A}j, i < j} \beta \left[ \log(1 + f(\mathbf{0})/\beta) + \frac{f(E_{ij}) - f(\mathbf{0})}{\beta} \right. \\ &\quad \left. - \mathcal{O}((f(E_{ij}) - f(\mathbf{0}))^2) \right] \end{aligned}$$

Since  $f$  is  $L$ -Lipschitz,

$$\begin{aligned} &= F(\widehat{\Omega}) - M\gamma \cdot \beta \log(1 + f(\mathbf{0})/\beta) \\ &\quad + \sum_{k=1}^K \frac{n_k}{2} \left( \langle E^{(k)}, S^{(k)} \rangle - \mathcal{O}(\|E^{(k)}\|_F^2) \right) \\ &\quad + \gamma \sum_{i \neq \mathcal{A}j, i < j} \beta \left[ \log(1 + f(\mathbf{0})/\beta) + \frac{f(E_{ij}) - f(\mathbf{0})}{\beta} \right. \\ &\quad \left. - L^2 \cdot \mathcal{O}(\|E_{ij}\|_2^2) \right] \end{aligned}$$

Simplifying,

$$\begin{aligned} &= F(\widehat{\Omega}) + \sum_{k=1}^K \frac{n_k}{2} \left( \langle E^{(k)}, S^{(k)} \rangle - \mathcal{O}(\|E^{(k)}\|_F^2) \right) \\ &\quad + \gamma \sum_{i \neq \mathcal{A}j, i < j} \beta \left[ \frac{f(E_{ij}) - f(\mathbf{0})}{\beta} - L^2 \cdot \mathcal{O}(\|E_{ij}\|_2^2) \right] \end{aligned}$$

If we assume that  $-\gamma^{-1} \cdot \text{diag}\{n_1, \dots, n_K\} \cdot \mathbf{S}_{ij} \in \partial f(\mathbf{0})$  for all  $i \neq \mathcal{A}j$ ,

$$\begin{aligned} &\geq F(\widehat{\Omega}) + \sum_{k=1}^K \frac{n_k}{2} \left( \langle E^{(k)}, S^{(k)} \rangle - \mathcal{O}(\|E^{(k)}\|_F^2) \right) \\ &\quad + \gamma \sum_{i \neq \mathcal{A}j, i < j} \beta \left[ \frac{\langle E_{ij}, -\gamma^{-1} \cdot \text{diag}\{n_1, \dots, n_K\} \cdot \mathbf{S}_{ij} \rangle}{\beta} \right. \\ &\quad \left. - L^2 \cdot \mathcal{O}(\|E_{ij}\|_2^2) \right] \end{aligned}$$

Cancelling out the terms that are linear in  $E$ ,

$$\begin{aligned} &= F(\widehat{\Omega}) - \sum_{k=1}^K \frac{n_k}{2} \mathcal{O}(\|E^{(k)}\|_F^2) - \alpha \sum_{i \neq \mathcal{A}j, i < j} L^2 \mathcal{O}(\|E_{ij}\|_2^2) \\ &= F(\widehat{\Omega}) - \mathcal{O}\left(\sum_{i,j,k} E_{ij}^{(k)2}\right) \geq F(\widehat{\Omega}) - \mathcal{O}\left(\sum_{i,j,k} \Delta_{ij}^{(k)2}\right). \end{aligned}$$

Since  $F$  is convex over  $\mathcal{S}_p(b)$  which is itself a convex set, this is sufficient to prove that  $\widehat{\Omega}$  is a minimizer of  $F(\cdot)$  over  $\mathcal{S}_p(b)$ .  $\square$
